# Supplementary material for: Episodic Memory Encoding and Retrieval in Face-Name Paired Paradigm: An fNIRS Study
Source: MDPI journal article supplement (doi:10.3390/brainsci11070951), 2021-07-19
Supplement: s1 [file s1]

## Supplementary Materials

### Accuracy in Retrieval Phases

|         | Accuracy  |                    |                      |                |                 |
|---------|-----------|--------------------|----------------------|----------------|-----------------|
| Subject | Retrieval | Retrieval twowords | Retrieval threewords | Retrieval same | Retrieval novel |
| 1       | 55.36%    | 53.57%             | 57.14%               | 100.00%        | 10.71%          |
| 2       | 51.79%    | 53.57%             | 50.00%               | 100.00%        | 3.57%           |
| 3       | 57.14%    | 57.14%             | 57.14%               | 100.00%        | 14.29%          |
| 4       | 53.57%    | 50.00%             | 57.14%               | 100.00%        | 7.14%           |
| 5       | 53.57%    | 50.00%             | 57.14%               | 100.00%        | 7.14%           |
| 6       | 39.29%    | 25.00%             | 53.57%               | 75.00%         | 3.57%           |
| 7       | 69.64%    | 71.43%             | 67.86%               | 100.00%        | 39.29%          |
| 8       | 57.14%    | 60.71%             | 53.57%               | 100.00%        | 14.29%          |
| 9       | 53.57%    | 50.00%             | 57.14%               | 100.00%        | 7.14%           |
| 10      | 41.07%    | 32.14%             | 50.00%               | 75.00%         | 7.14%           |
| 11      | 58.93%    | 57.14%             | 60.71%               | 100.00%        | 17.86%          |
| 12      | 23.21%    | 46.43%             | 0.00%                | 42.86%         | 3.57%           |
| 13      | 62.50%    | 60.71%             | 64.29%               | 100.00%        | 25.00%          |
| 14      | 53.57%    | 53.57%             | 53.57%               | 100.00%        | 7.14%           |
| 15      | 44.64%    | 28.57%             | 60.71%               | 71.43%         | 17.86%          |
| 16      | 39.29%    | 28.57%             | 50.00%               | 75.00%         | 3.57%           |
| 17      | 62.50%    | 57.14%             | 67.86%               | 100.00%        | 25.00%          |
| 18      | 55.36%    | 53.57%             | 57.14%               | 96.43%         | 14.29%          |
| 19      | 55.36%    | 53.57%             | 57.14%               | 100.00%        | 10.71%          |
| 20      | 62.50%    | 57.14%             | 67.86%               | 89.29%         | 32.14%          |
| 21      | 58.93%    | 53.57%             | 64.29%               | 96.43%         | 21.43%          |
| 22      | 53.57%    | 53.57%             | 53.57%               | 96.43%         | 10.71%          |
